# Supplementary material
Source: publisher site journal article supplement (https://www.dovepress.com/article/422364)
Supplement: Supplementary file 1 [file get_supplementary_file.php]

Appendix 1

Rad-score = 0.2273526+0.127921×wavelet-HHL_gldm_HighGrayLevelEmphasis

- 0.001577×wavelet-HHL_firstorder_Maximum

+ 0.117071×wavelet-LLH_glrlm_GrayLevelNonUniformity

- 0.117166×squareroot_glcm_Imc1

+ 0.040421×square_glrlm_RunLengthNonUniformity

+ 0.076190×gradient_firstorder_90Percentile
